# Supplementary material for: Health Care Utilization Before and After the “Muslim Ban” Executive Order Among People Born in Muslim-Majority Countries and Living in the US
Source: PubMed Central journal article supplement (PMC8325073; doi:10.1001/jamanetworkopen.2021.18216), 2021-07-30
Supplement: jamanetwopen-e2118216-s001.pdf [file jamanetwopen-e2118216-s001.pdf]

## Supplementary Online Content

Samuels EA, Orr L, White EB, et al. Health care utilization before and after the “Muslim ban” executive order among people born in Muslim-majority countries and living in the US. *JAMA Netw Open*. 2021;4(7):e2118216. doi:10.1001/jamanetworkopen.2021.18216

**eTable 1.** Group 1 Country of Origin: People Born in a Muslim Ban Order Targeted Nation

**eTable 2.** Group 2 Country of Origin: People Born in a Muslim-Majority Country Not Targeted by the Muslim Ban

**eTable 3.** ICD-10 Codes Included in Analysis of Stress-Responsive Clinic Diagnoses

**eTable 4.** Emergency Department Acute Stress Diagnoses and Ambulatory Sensitive Conditions

**eTable 5.** Analysis of Linear Time Trends in Pre-Order Periods, Group 1 vs 3 (Unweighted)

**eTable 6.** Analysis of Linear Time Trends in Pre-Order Periods, Group 1 vs 3 After Exact Matching on Demographics

**eTable 7.** Difference-in-Differences Estimates of the Effect of the Muslim Ban Order on all Outcomes Among Patients From Order Targeted Nations (Group 1)

**eTable 8.** Difference in Differences With Linear Time Trend

**eTable 9.** Difference-in-Differences Estimates After Matching

**eTable 10.** Characteristics of HealthPartners Patients Seeking Care in a Primary Care Clinic or Emergency Department Between January 2016 and December 2017, After Reweighting Through Matching on Demographics

**eFigure.** Time Trends for all Primary Outcomes Among Patients From Muslim Ban-Targeted Nations and Demographically Matched US-Born non-Latin American Patients, January 2016 to December 2017

**eTable 11.** Difference in Differences Comparing Individuals Born in a Muslim-Majority Nation Not Named in the Muslim Ban Order and US-Born, Non-Latin American Individuals

This supplementary material has been provided by the authors to give readers additional information about their work.

**eTable 1.** Group 1 Country of Origin: People Born in a Muslim Ban Order Targeted Nation (n=5,667)

| <b>Country</b> | <b>N (%)</b> |
|----------------|--------------|
| Somalia        | 5231 (92.31) |
| Iraq           | 142 (2.51)   |
| Sudan          | 130 (2.29)   |
| Iran           | 109 (1.92)   |
| Syria          | 29 (0.51)    |
| Yemen          | 20 (0.35)    |
| Libya          | 6 (0.11)     |

**eTable 2.** Group 1 Country of Origin: People Born in a Muslim-Majority Country Not Targeted by the Muslim Ban (n=1,254)

| <b>Country</b>         | <b>N (%)</b> |
|------------------------|--------------|
| Pakistan               | 213 (16.99)  |
| Egypt                  | 177 (14.11)  |
| Bosnia And Herzegovina | 98 (7.81)    |
| Sierra Leone           | 91 (7.26)    |
| Afghanistan            | 84 (6.70)    |
| United Arab Emirates   | 70 (5.58)    |
| Bangladesh             | 58 (4.63)    |
| Turkey                 | 53 (4.23)    |
| Guinea                 | 49 (3.91)    |
| Jordan                 | 48 (3.83)    |
| Lebanon                | 47 (3.75)    |
| Kuwait                 | 40 (3.19)    |
| Morocco                | 37 (2.95)    |
| Malaysia               | 36 (2.87)    |
| Indonesia              | 33 (2.63)    |
| Gambia                 | 23 (1.83)    |
| Djibouti               | 16 (1.28)    |
| Algeria                | 14 (1.12)    |
| Tunisia                | 11 (0.88)    |
| Senegal                | 9 (0.72)     |
| Uzbekistan             | 8 (0.64)     |
| Bahrain                | 6 (0.48)     |
| Azerbaijan             | 5 (0.40)     |
| Kazakhstan             | 5 (0.40)     |
| Albania                | 4 (0.32)     |
| Burkina Faso           | 3 (0.24)     |
| Kosovo                 | 2 (0.16)     |
| <b>Country</b>         | <b>N (%)</b> |
| Kyrgyzstan             | 2 (0.16)     |
| Mali                   | 2 (0.16)     |
| Niger                  | 2 (0.16)     |
| Qatar                  | 2 (0.16)     |
| Tajikistan             | 2 (0.16)     |
| Brunei                 | 1 (0.08)     |
| Maldives               | 1 (0.08)     |
| Oman                   | 1 (0.08)     |
| Turkmenistan           | 1 (0.08)     |

## ICD-10 codes used in analysis of stress-responsive diagnoses

Prior to collecting or observing any data, research team members chose the following ICD-10 codes to include in analysis of stress-responsive diagnoses.

**eTable 3.** ICD-10 Codes Included in Analysis of Stress-Responsive Clinic Diagnoses

| Category      | Diagnoses                                                                                                | ICD-10 codes                                                                                                                                                                                                                                                                                                                                                                                                                                                                                                                                                                                                                                                                                                                                                                                                                                                                                                                                                                                                                                                                                                                                                                                                                                                                                                                                                                                                                                                                                                                                                                                                                                                                                                                                                                                                                                                                                                                                                                                                                                                                                                                                                                                                                                                                                                                                                                                                                                                                                                                                                                                                                                                                                                                                                                       |
|---------------|----------------------------------------------------------------------------------------------------------|------------------------------------------------------------------------------------------------------------------------------------------------------------------------------------------------------------------------------------------------------------------------------------------------------------------------------------------------------------------------------------------------------------------------------------------------------------------------------------------------------------------------------------------------------------------------------------------------------------------------------------------------------------------------------------------------------------------------------------------------------------------------------------------------------------------------------------------------------------------------------------------------------------------------------------------------------------------------------------------------------------------------------------------------------------------------------------------------------------------------------------------------------------------------------------------------------------------------------------------------------------------------------------------------------------------------------------------------------------------------------------------------------------------------------------------------------------------------------------------------------------------------------------------------------------------------------------------------------------------------------------------------------------------------------------------------------------------------------------------------------------------------------------------------------------------------------------------------------------------------------------------------------------------------------------------------------------------------------------------------------------------------------------------------------------------------------------------------------------------------------------------------------------------------------------------------------------------------------------------------------------------------------------------------------------------------------------------------------------------------------------------------------------------------------------------------------------------------------------------------------------------------------------------------------------------------------------------------------------------------------------------------------------------------------------------------------------------------------------------------------------------------------------|
| Mental health | Panic disorder<br>GAD<br>Anxiety<br>New SI<br>Depression<br>Acute stress disorder<br>Adjustment disorder | F41.0 Panic disorder [episodic paroxysmal anxiety]<br>F41.1 Generalized anxiety disorder<br>F41.3 Other mixed anxiety disorders<br>F41.8 Other specified anxiety disorders<br>F41.9 Anxiety disorder, unspecified<br>F41 Other anxiety disorders (NB)<br>F51.5 Nightmare disorder<br>F32 Major depressive disorder, single episode (NB)<br>F32.0 Major depressive disorder, single episode, mild<br>F32.1 Major depressive disorder, single episode, moderate<br>F32.2 Major depressive disorder, single episode, severe without psychotic features<br>F32.3 Major depressive disorder, single episode, severe with psychotic features<br>F32.4 Major depressive disorder, single episode, in partial remission<br>F32.89 Other specified depressive episodes<br>F32.9 Major depressive disorder, single episode, unspecified<br>F33 Major depressive disorder, recurrent (NB)<br>F33.0 Major depressive disorder, recurrent, mild<br>F33.1 Major depressive disorder, recurrent, moderate<br>F33.2 Major depressive disorder, recurrent severe without psychotic features<br>F33.3 Major depressive disorder, recurrent, severe with psychotic symptoms<br>F33.40 Major depressive disorder, recurrent, in remission, unspecified<br>F33.41 Major depressive disorder, recurrent, in partial remission<br>F33.42 Major depressive disorder, recurrent, in full remission<br>F33.9 Major depressive disorder, recurrent, unspecified<br>F31.30 Bipolar disorder, current episode depressed, mild or moderate severity, unspecified<br>F31.9 Bipolar disorder, unspecified<br>F06.31 Mood disorder due to known physiological condition with depressive features<br>F43.0 (see below)<br>F43.1 Post-traumatic stress disorder (PTSD) (NB)<br>F43.10 Post-traumatic stress disorder, unspecified<br>F43.11 Post-traumatic stress disorder, acute<br>F43.12 Post-traumatic stress disorder, chronic<br>F43.0 Acute stress reaction<br>F43.8 Other reactions to severe stress<br>F43.9 Reaction to severe stress, unspecified<br>R45.7 State of emotional shock and stress, unspecified<br>R46.6 Undue concern and preoccupation with stressful events<br>Z63.7 Other stressful life events affecting family and household (NB)<br>Z63.79 Other stressful life events affecting family and household<br>Z73.3 Stress, not elsewhere classified<br>F43.2 Adjustment disorders (NB)<br>F43.20 Adjustment disorder, unspecified<br>F43.21 Adjustment disorder with depressed mood<br>F43.22 Adjustment disorder with anxiety<br>F43.23 Adjustment disorder with mixed anxiety and depressed mood<br>F43.24 Adjustment disorder with disturbance of conduct<br>F43.25 Adjustment disorder with mixed disturbance of emotions and conduct<br>F43.29 Adjustment disorder with other symptoms |

| Category         | Diagnoses                                                                                                  | ICD-10 codes                                                                                                                                                                                                                                                                                                                                                                                                                                                                                                                                                                                                                                                                                                                                                                                                                                                                                                                                                                                                                                                                                                                                                                                                            |
|------------------|------------------------------------------------------------------------------------------------------------|-------------------------------------------------------------------------------------------------------------------------------------------------------------------------------------------------------------------------------------------------------------------------------------------------------------------------------------------------------------------------------------------------------------------------------------------------------------------------------------------------------------------------------------------------------------------------------------------------------------------------------------------------------------------------------------------------------------------------------------------------------------------------------------------------------------------------------------------------------------------------------------------------------------------------------------------------------------------------------------------------------------------------------------------------------------------------------------------------------------------------------------------------------------------------------------------------------------------------|
| Sleep disorders  | Insomnia                                                                                                   | G47.0 Insomnia (NB)<br>G47.00 Insomnia, unspecified<br>G47.09 Other insomnia<br>F51.0 Insomnia not due to a substance or known physiological condition (NB)<br>F51.01 Primary insomnia<br>F51.02 Adjustment insomnia<br>F51.04 Psychophysiological insomnia<br>F51.05 Insomnia due to other mental disorder<br>F51.09 Other insomnia not due to a substance or known physiological condition<br>Z72.820 Sleep deprivation<br>Z72.821 Inadequate sleep hygiene                                                                                                                                                                                                                                                                                                                                                                                                                                                                                                                                                                                                                                                                                                                                                           |
| Non-specific     | Fatigue<br>Malaise                                                                                         | R53 Malaise and fatigue (NB)<br>R53.8 Other malaise and fatigue (NB)<br>R53.81 Other malaise<br>R53.83 Other fatigue                                                                                                                                                                                                                                                                                                                                                                                                                                                                                                                                                                                                                                                                                                                                                                                                                                                                                                                                                                                                                                                                                                    |
| Gastrointestinal | GERD<br>PUD (H. pylori)<br>Abdominal pain (recurrent, NOS, flank pain, epigastric pain)<br>Irritable bowel | K21 Gastro-esophageal reflux disease<br>K21.0 Gastro-esophageal reflux disease with esophagitis<br>K21.9 Gastro-esophageal reflux disease without esophagitis<br>B96.81 Helicobacter pylori [H. pylori] as the cause of diseases classified elsewhere<br>K27 Peptic ulcer, site unspecified (NB)<br>K27.0 Acute peptic ulcer, site unspecified, with hemorrhage<br>K27.3 Acute peptic ulcer, site unspecified, without hemorrhage or perforation<br>K25 Gastric ulcer (NB)<br>K26 Duodenal ulcer (NB)<br>R10.10 Upper abdominal pain, unspecified<br>R10.11 Right upper quadrant pain<br>R10.12 Left upper quadrant pain<br>R10.13 Epigastric pain<br>R10.30 Lower abdominal pain, unspecified<br>R10.31 Right lower quadrant pain<br>R10.32 Left lower quadrant pain<br>R10.33 Periumbilical pain<br>R10.8 Other abdominal pain (NB)<br>R10.84 Generalized abdominal pain<br>R10.9 Unspecified abdominal pain<br>K58 Irritable bowel syndrome (NB)<br>K58.0 Irritable bowel syndrome with diarrhea<br>K58.1 Irritable bowel syndrome with constipation<br>K58.2 Mixed irritable bowel syndrome<br>K58.8 Other irritable bowel syndrome<br>K58.9 Irritable bowel syndrome without diarrhea<br>K59.1 Functional diarrhea |
| Neuro            | Headache                                                                                                   | G43 Migraine (NB)<br>G44 Other headache syndromes (NB)<br>G44.209 Tension Headache<br>G44.219 Tension Headache, episodic                                                                                                                                                                                                                                                                                                                                                                                                                                                                                                                                                                                                                                                                                                                                                                                                                                                                                                                                                                                                                                                                                                |

| Category       | Diagnoses                    | ICD-10 codes                                                                                                                                                                                                                                                                                                                                                                                                                                                                                                                                                                                                                                                                                                                                                                                     |
|----------------|------------------------------|--------------------------------------------------------------------------------------------------------------------------------------------------------------------------------------------------------------------------------------------------------------------------------------------------------------------------------------------------------------------------------------------------------------------------------------------------------------------------------------------------------------------------------------------------------------------------------------------------------------------------------------------------------------------------------------------------------------------------------------------------------------------------------------------------|
| Food-related   | Weight loss<br>Poor appetite | R63.5 Abnormal weight gain<br>R63.8 Other symptoms and signs concerning food and fluid intake<br>F50.89 Other specified eating disorder<br>R63.0 Anorexia<br><br>R63.4 Abnormal weight loss<br>R63.2 Polyphagia<br>O26.10 Low weight gain in pregnancy                                                                                                                                                                                                                                                                                                                                                                                                                                                                                                                                           |
| Pain Syndromes | Chronic Pain<br>Back Pain    | F45.41 Pain disorder exclusively related to psychological factors<br>F45.42 Pain disorder with related psychological factors<br>G89 Pain, not elsewhere classified (NB)<br>G89.2 Chronic pain, not elsewhere classified (NB)<br>G89.29 Other chronic pain<br>G89.4 Chronic pain syndrome<br>M79.601 Pain in right arm<br>M79.602 Pain in left arm<br>M79.603 Pain in arm, unspecified<br>M79.671 Pain in right foot<br>M79.672 Pain in left foot<br>R52 Pain, unspecified<br>M53.3 Sacrococcygeal disorders, not elsewhere classified<br>M54.2 Cervicalgia<br>M54.41 Lumbago with sciatica, right side<br>M54.42 Lumbago with sciatica, left side<br>M54.5 Low back pain<br>M54.6 Pain in thoracic spine<br>M54.8 Other dorsalgia (NB)<br>M54.89 Other dorsalgia<br>M54.9 Dorsalgia, unspecified |

**eTable 4.** Emergency Department Acute Stress Diagnoses and Ambulatory Sensitive Conditions

| Category                        | Diagnoses                                                                                      | ICD-10 codes                                                                                                                                                                                                               |
|---------------------------------|------------------------------------------------------------------------------------------------|----------------------------------------------------------------------------------------------------------------------------------------------------------------------------------------------------------------------------|
| Stress-responsive diagnoses     | Acute coronary syndrome<br>Assault<br>Suicide attempt<br>Syncope                               | I21.0-I21.A; I24.9<br>Y09., Y08.89x, X99.0xx-X92.9xx; Y01.xxx, Y97.xxx, Y38.3x1- Y38.3x3;<br>T54.1x3-T54.3x3; X98.0xx-X98.9xx; X93.xxx- X95.9xx; Y03.8xx; Y02.0xx,<br>Y00.xxx, Y04.0xx- Y04.2xx, Y04.8xx; Y08.01x- Y08.09x |
| Ambulatory sensitive conditions | Angina<br>Asthma<br>Congestive heart failure<br>COPD<br>Hypertension<br>Diabetes complications | I20, I24.0, I24.8–24.9<br>J45-46<br>Iii.0, I50, J81<br>J41-44, J47<br>I10, I11.9<br>E10.0–10.8, E11.0–11.8, E12.0–12.8, E13.0–13.8, E14.0–14.8                                                                             |

## Analysis of pre-Order trends

In order to interpret the difference in differences presented in the manuscript as evidence of effects of the Muslim Ban, we would need to assume that in the absence of the executive order, the change in utilization and diagnoses would have been identical across groups. Although we cannot verify this assumption, we can observe whether or not differential trends appear before the executive order is issued. As the visualization in Figure 1 suggests, individuals from Muslim Ban targeted nations began to increase clinic utilization, relative to non-Latinx U.S.-born individuals, before the issuance of the executive order. Increases in stress-responsive diagnoses in the clinic are also observed before the executive order is issued. After restricting the comparison group through matching on patient demographics, these pre-Order trend differences are still present.

**eTable 5.** Analysis of Linear Time Trends in Pre-Order Periods, Group 1 vs 3 (Unweighted)

|                                | Dependent Variable                                      |                     |                  |                  |                  |
|--------------------------------|---------------------------------------------------------|---------------------|------------------|------------------|------------------|
|                                | Count of Visits or Diagnoses<br>(Robust standard error) |                     |                  |                  |                  |
|                                | Clinic Visits                                           | Missed Appointments | Clinic Diagnoses | ED Visits        | ED Diagnoses     |
| Order Targeted                 | 35.36<br>(4.79)                                         | 16.89<br>(2.00)     | 50.14<br>(12.14) | -11.90<br>(1.71) | -65.40<br>(6.01) |
| 30 Day Period                  | -0.34<br>(0.09)                                         | 0.15<br>(0.03)      | 0.58<br>(0.25)   | 0.03<br>(0.05)   | 1.64<br>(0.22)   |
| Order Targeted * 30 Day Period | 3.13<br>(0.63)                                          | 0.006<br>(0.27)     | 5.01<br>(1.61)   | -0.19<br>(0.23)  | -1.62<br>(0.80)  |
| Constant                       | 158.30<br>(0.67)                                        | 29.86<br>(0.30)     | 419.89<br>(1.85) | 32.07<br>(0.39)  | 129.62<br>(1.64) |
| Observations (N)               | 3016080                                                 | 3016080             | 3016080          | 3016080          | 3016080          |
| R <sup>2</sup>                 | 0.00003                                                 | 0.00017             | 0.00001          | 0.00003          | 0.00006          |

**eTable 6.** Analysis of Linear Time Trends in Pre-Order Periods, Group 1 vs 3 After Exact Matching on Demographics

|                                | Dependent Variable                                      |                     |                   |                  |                    |
|--------------------------------|---------------------------------------------------------|---------------------|-------------------|------------------|--------------------|
|                                | Count of Visits or Diagnoses<br>(Robust standard error) |                     |                   |                  |                    |
|                                | Clinic Visits                                           | Missed Appointments | Clinic Diagnoses  | ED Visits        | ED Diagnoses       |
| Order Targeted                 | 62.48<br>(5.21)                                         | 4.16<br>(2.26)      | 128.82<br>(13.34) | -64.17<br>(2.68) | -240.43<br>(10.00) |
| 30 Day Period                  | -1.10<br>(0.31)                                         | -0.19<br>(0.14)     | -2.33<br>(0.81)   | -0.23<br>(0.29)  | 3.89<br>(1.07)     |
| Order Targeted * 30 Day Period | 3.79<br>(0.69)                                          | 0.33<br>(0.31)      | 7.88<br>(1.78)    | 0.07<br>(0.36)   | -3.85<br>(1.32)    |
| Constant                       | 129.86<br>(2.23)                                        | 42.35<br>(1.07)     | 339.48<br>(5.87)  | 84.40<br>(2.10)  | 304.82<br>(8.15)   |
| Observations (N)               | 1303164                                                 | 1303164             | 1303164           | 1303164          | 1303164            |
| R <sup>2</sup>                 | 0.0003                                                  | 0.00001             | 0.00019           | 0.00087          | 0.00078            |

## Difference in differences estimates for all outcomes

Although we do not ascribe a causal interpretation to all difference in differences estimates, the full set of analyses originally planned are presented in Table S7. This is an expanded version of Table 2 in the main text.

**eTable 7.** Difference-in-Differences Estimates of the Effect of the Muslim Ban Order on all Outcomes Among Patients From Order Targeted Nations (Group 1)

| Outcome<br>(average per person)                          | Difference in Differences Model |                          |                    |                                                  | Matched Difference<br>in Differences Model<br>Estimate<br>(SE) | Generalized<br>Synthetic Control<br>Model Estimate<br>(SE) |
|----------------------------------------------------------|---------------------------------|--------------------------|--------------------|--------------------------------------------------|----------------------------------------------------------------|------------------------------------------------------------|
|                                                          | Means<br>(SD)                   | U.S.-born,<br>non-Latinx | Order-<br>Targeted | Difference in<br>Differences<br>Estimate<br>(SE) |                                                                |                                                            |
| Primary care visits                                      | Pre-Order                       | 160.5<br>(539.9)         | 175.5<br>(559.6)   | <b>22.85**</b><br>(3.71)                         | <b>23.69**</b><br>(4.03)                                       | <b>26.26**</b><br>(3.09)                                   |
|                                                          | Post-Order                      | 163.9<br>(552.6)         | 201.8<br>(620.8)   |                                                  |                                                                |                                                            |
|                                                          | First<br>Difference             | <b>3.4</b>               | <b>26.3</b>        |                                                  |                                                                |                                                            |
| Missed primary care<br>appointments                      | Pre-Order                       | 28.9<br>(197.0)          | 45.8<br>(240.1)    | <b>1.92</b><br>(1.47)                            | <b>2.99</b><br>(1.66)                                          | <b>2.37</b><br>(1.17)                                      |
|                                                          | Post-Order                      | 29.4<br>(119.4)          | 48.1<br>(250.7)    |                                                  |                                                                |                                                            |
|                                                          | First<br>Difference             | <b>0.4</b>               | <b>2.4</b>         |                                                  |                                                                |                                                            |
| Stress-responsive<br>diagnoses in primary<br>care        | Pre-Order                       | 416.1<br>(1476.5)        | 433.7<br>(1436.8)  | <b>48.03**</b><br>(9.17)                         | <b>57.53**</b><br>(9.97)                                       | <b>63.9**</b><br>(7.87)                                    |
|                                                          | Post-Order                      | 432.0<br>(1529.8)        | 497.6<br>(1574.0)  |                                                  |                                                                |                                                            |
|                                                          | First<br>Difference             | <b>15.9</b>              | <b>63.9</b>        |                                                  |                                                                |                                                            |
| ED visits per person                                     | Pre-Order                       | 31.9<br>(119.0)          | 21.2<br>(214.7)    | <b>3.41*</b><br>(1.53)                           | <b>5.00*</b><br>(2.34)                                         | <b>4.41*</b><br>(2.00)                                     |
|                                                          | Post-Order                      | 32.9<br>(333.2)          | 25.6<br>(260.0)    |                                                  |                                                                |                                                            |
|                                                          | First<br>Difference             | <b>1.0</b>               | <b>4.4</b>         |                                                  |                                                                |                                                            |
| ED ambulatory<br>sensitive and acute<br>stress diagnoses | Pre-Order                       | 119.0<br>(1269)          | 64.1<br>(727.7)    | <b>4.93</b><br>(5.79)                            | <b>-4.32</b><br>(9.09)                                         | <b>19.3**</b><br>(8.90)                                    |
|                                                          | Post-Order                      | 133.3<br>(1428)          | 83.4<br>(956.8)    |                                                  |                                                                |                                                            |
|                                                          | First<br>Difference             | <b>14.4</b>              | <b>19.3</b>        |                                                  |                                                                |                                                            |

$p < 0.05^*$ ,  $p < 0.01^{**}$

*Note:* As in the main text, difference in differences estimates are additional increases in each outcome (per 1000 people per 30-day time period) from the year before to the year after the Muslim Ban was issued among individuals from targeted nations, beyond the increases observed in a reference group. Robust standard errors are included in parentheses for difference in difference estimates, clustered at the individual level, with and without demographic matching. Parametric bootstrap standard errors are included in parentheses for generalized synthetic control model estimates. The estimated sampling distributions do not necessarily follow an approximately normal distribution centered at the point estimate.



## Robustness checks

To assess the robustness of the difference in differences analysis presented in the manuscript, we conducted two additional checks. First, we report estimates from a model which allows for a linear time trend as an alternative to period fixed effects. Second, we report regression coefficients and sample characteristics for the difference-in-differences models comparing the individuals from targeted nations to U.S.-born non-Latinx individuals with similar age, sex, race, and insurance to those observed for individuals from targeted nations. This reference group was selected using exact matching on all available demographics.

**eTable 8.** Difference in Differences With Linear Time Trend

|                              | Dependent Variable                               |                     |                  |                  |                  |
|------------------------------|--------------------------------------------------|---------------------|------------------|------------------|------------------|
|                              | Count of Visits or Diagnoses                     |                     |                  |                  |                  |
|                              | (Robust standard error, clustered by individual) |                     |                  |                  |                  |
|                              | Clinic Visits                                    | Missed Appointments | Clinic Diagnoses | ED Visits        | ED Diagnoses     |
| Order Targeted               | 14.12<br>(3.49)                                  | 16.95<br>(1.25)     | 17.61<br>(8.30)  | -10.66<br>(1.15) | -54.50<br>(4.20) |
| Order Targeted<br>Post-Order | 24.66<br>(3.70)                                  | 1.72<br>(1.47)      | 4.80<br>(9.16)   | 3.40<br>(1.53)   | 4.24<br>(5.76)   |
| Period                       | 0.12<br>(0.03)                                   | 0.05<br>(0.01)      | 1.22<br>(0.09)   | 0.08<br>(0.02)   | 1.16<br>(0.09)   |
| Constant                     | 162.20<br>(0.44)                                 | 29.14<br>(0.14)     | 434.03<br>(1.09) | 32.39<br>(0.23)  | 126.15<br>(0.94) |
| Observations                 | 6032160                                          | 6032160             | 6032160          | 6032160          | 6032160          |
| Adjusted R2                  | 0.00007                                          | 0.00018             | 0.00006          | 0.00002          | 0.00007          |

**eTable 9.** Difference-in-Differences Estimates After Matching

|                              | Dependent Variable                               |                     |                  |                  |                   |
|------------------------------|--------------------------------------------------|---------------------|------------------|------------------|-------------------|
|                              | Count of Visits or Diagnoses                     |                     |                  |                  |                   |
|                              | (Robust standard error, clustered by individual) |                     |                  |                  |                   |
|                              | Clinic Visits                                    | Missed Appointments | Clinic Diagnoses | ED Visits        | ED Diagnoses      |
| Order Targeted               | 37.86<br>(3.91)                                  | 2.04<br>(1.46)      | 77.57<br>(9.37)  | -64.63<br>(1.95) | -215.38<br>(7.28) |
| Order Targeted<br>Post-Order | 23.69<br>(4.03)                                  | 2.99<br>(1.66)      | 57.53<br>(9.97)  | 5.00<br>(2.34)   | -4.32<br>(9.09)   |
| Constant                     | 145.95<br>(3.73)                                 | 45.45<br>(1.66)     | 374.25<br>(9.78) | 83.60<br>(3.20)  | 254.50<br>(10.44) |
| Period FE                    | Yes                                              | Yes                 | Yes              | Yes              | Yes               |
| Observations                 | 2606328                                          | 2606328             | 2606328          | 2606328          | 2606328           |
| Adjusted R2                  | 0.00067                                          | 0.00009             | 0.00056          | 0.0008           | 0.00078           |

**eTable 10.** Characteristics of HealthPartners Patients Seeking Care in a Primary Care Clinic or Emergency Department Between January 2016 and December 2017, After Reweighting Through Matching on Demographics

|                                  | <b>Re-weighted after matching with race</b>                                                |                                                                        |
|----------------------------------|--------------------------------------------------------------------------------------------|------------------------------------------------------------------------|
|                                  | <b>Group 1<br/>People born in an<br/>Order targeted nation<br/>(n = 5,654)<br/>No. (%)</b> | <b>Group 3<br/>U.S.-born, non-Latinx<br/>(n = 102,943)<br/>No. (%)</b> |
| <b>Race</b>                      |                                                                                            |                                                                        |
| American Indian/Alaskan Native   | 10 (0.2)                                                                                   | 182.1 (0.2)                                                            |
| Asian                            | 44 (0.8)                                                                                   | 801.1 (0.8)                                                            |
| Black                            | 5,229 (92.5)                                                                               | 95,205 (92.5)                                                          |
| Native Hawaiian/Pacific Islander | 5 (0.1)                                                                                    | 91 (0.1)                                                               |
| White                            | 155 (2.7)                                                                                  | 2822.1 (2.7)                                                           |
| <b>Sex</b>                       |                                                                                            |                                                                        |
| Female                           | 3,360 (59.4)                                                                               | 61,175.9 (59.4)                                                        |
| Male                             | 2,294 (40.6)                                                                               | 111,786 (40.6)                                                         |
| <b>Age</b>                       |                                                                                            |                                                                        |
| 18-24                            | 498 (8.8)                                                                                  | 9,227.6 (9)                                                            |
| 25-34                            | 2,076 (36.7)                                                                               | 37,448 (20.3)                                                          |
| 35-44                            | 1,458 (25.8)                                                                               | 26,587 (25.8)                                                          |
| 45-54                            | 921 (16.3)                                                                                 | 16,432.5 (16)                                                          |
| 55-64                            | 518 (9.2)                                                                                  | 9,371.7 (9.1)                                                          |
| ≥65                              | 403 (7.1)                                                                                  | 7,392.8 (7.2)                                                          |
| <b>Insurance status</b>          |                                                                                            |                                                                        |
| Commercial                       | 995 (17.6)                                                                                 | 18,116.1 (17.6)                                                        |
| Medicare or Medicaid             | 4,419 (78.2)                                                                               | 80,457.2 (78.2)                                                        |

*Note:* As in Table 1, missing or unknown data not included in table; sums may not add to 100%. Re-weighted groups correspond to the comparison groups used when matching on all demographics.

**eFigure.** Time Trends for all Primary Outcomes Among Patients From Muslim Ban-Targeted Nations and Demographically Matched US-Born Non-Latin American Patients, January 2016 to December 2017

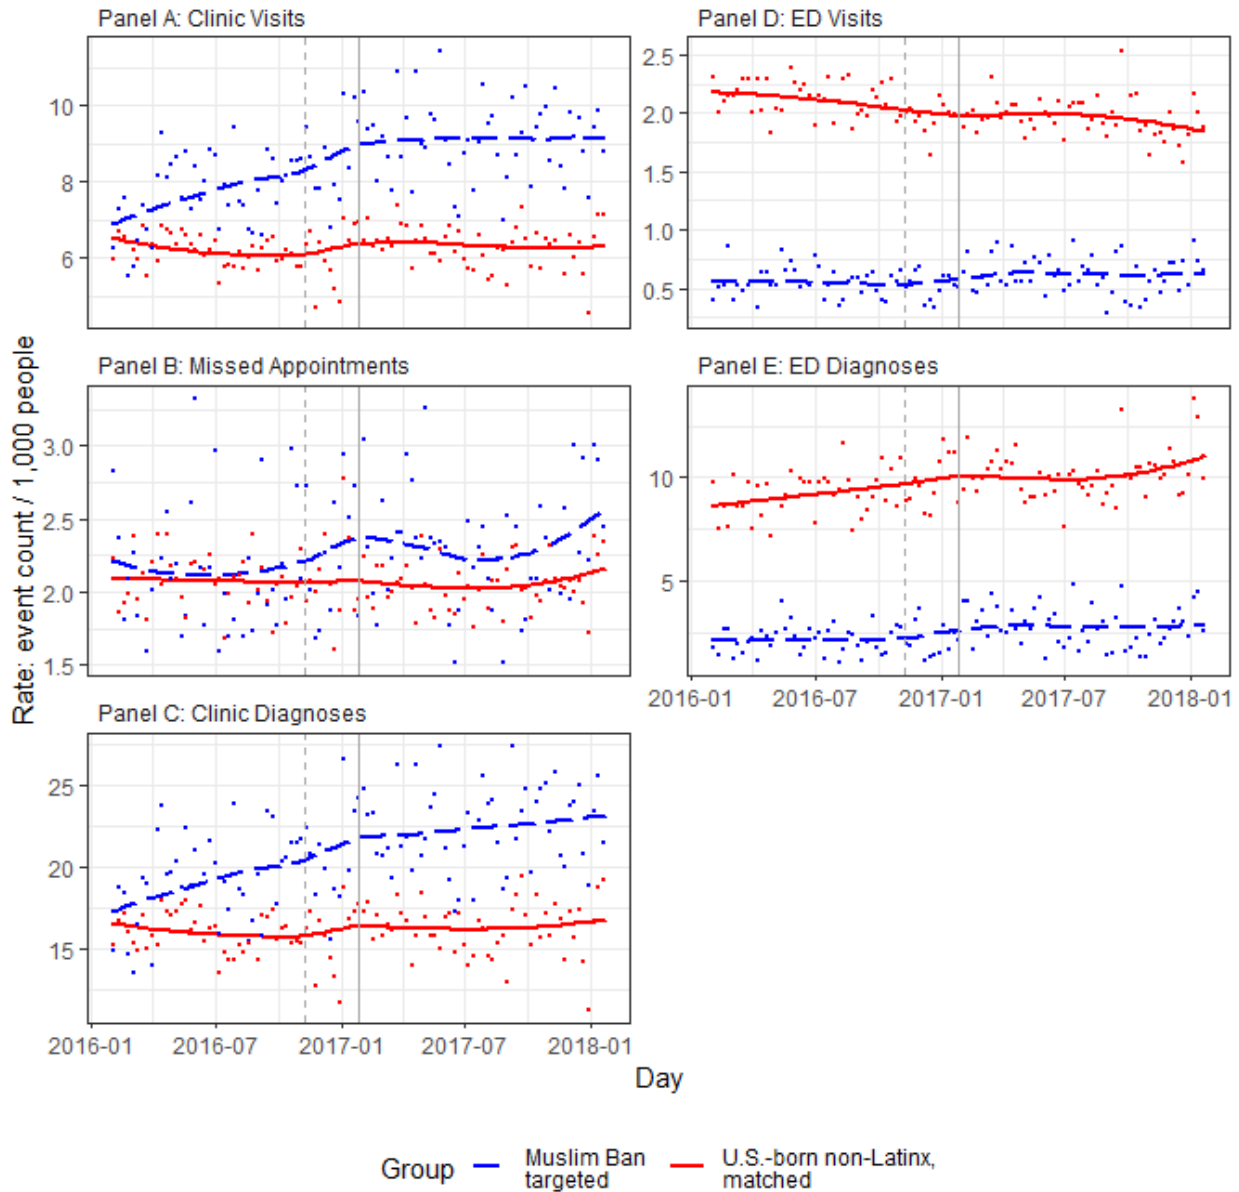

Points indicate weekly average counts per 1,000 people in each group after demographic matching for A) clinic visits, B) missed clinic appointments, C) clinic stress-responsive diagnoses, D) ED visits, and E) ED stress-responsive diagnoses. A LOESS regression line summarizing the time trend is included for each re-weighted group, based on daily average counts. For all clinic outcomes, panels A, B, and C, non-business days are excluded from the analysis. The solid line marks the Order issuance and the dotted line marks the 2016 election, for reference.

## Differences following the Muslim Ban among individuals from Muslim-majority nations not targeted in the Order

Because we observed utilization and diagnosis trends only for 1,254 individuals from other Muslim-majority nations, we are not able to robustly compare the experiences of these individuals from Muslim-majority nations that were and were not named in the executive order. Nonetheless, we note that a difference-in-differences analysis comparing individuals born in a Muslim majority nation not named in the Muslim Ban and U.S.-born, non-Latinx individuals reveals qualitatively similar trends to those observed for individuals from targeted nations.

**eTable 11.** Difference in Differences Comparing Individuals Born in a Muslim-Majority Nation Not Named in the Muslim Ban Order and US-Born, Non-Latin American Individuals

|                            | Dependent Variable                               |                     |                  |                 |                   |
|----------------------------|--------------------------------------------------|---------------------|------------------|-----------------|-------------------|
|                            | Count of Visits or Diagnoses                     |                     |                  |                 |                   |
|                            | (Robust standard error, clustered by individual) |                     |                  |                 |                   |
|                            | Clinic Visits                                    | Missed Appointments | Clinic Diagnoses | ED Visits       | ED Diagnoses      |
| Muslim majority            | 4.38<br>(7.36)                                   | 4.38<br>(2.21)      | 26.16<br>(18.92) | -9.10<br>(2.95) | -35.02<br>(14.97) |
| Muslim majority Post-Order | 30.55<br>(7.72)                                  | 6.73<br>(2.90)      | 72.98<br>(20.74) | 1.59<br>(3.30)  | -1.89<br>(15.38)  |
| Constant                   | 169.00<br>(1.13)                                 | 30.13<br>(0.41)     | 431.18<br>(3.03) | 30.51<br>(0.61) | 107.71<br>(2.38)  |
| Period FE                  | Yes                                              | Yes                 | Yes              | Yes             | Yes               |
| Observations (N)           | 5926248                                          | 5926248             | 5926248          | 5926248         | 5926248           |
| R <sup>2</sup>             | 0.00027                                          | 0.00007             | 0.00036          | 0.00002         | 0.00006           |
